# Supplementary material for: Polypeptide effect on Mg2+hydration inferred from CaCO3formation: a biomineralization study by counter-diffusion
Source: Royal Society of Chemistry journal article supplement (doi:10.1039/c6ce00184j), 2016-01-01
Supplement: c6ce00184j1.pdf [file c6ce00184j1.pdf]

## Supplementary Information

### Polypeptide Effect on Mg<sup>2+</sup> Hydration Inferred from CaCO<sub>3</sub> Formation: A Biomineralization Study by Counter-Diffusion

Maria Sancho Tomás<sup>a</sup>, Simona Fermani<sup>b</sup>, Michela Reggi<sup>b</sup>, Juan Manuel García Ruiz<sup>c</sup>, Jaime Gómez Morales<sup>c\*</sup>, Giuseppe Falini<sup>b\*</sup>

<sup>a</sup>Synchrotron Soleil, BP 48, Saint-Aubin, 91192 Gif-sur-Yvette, France.

<sup>b</sup>Dipartimento di Chimica “Giacomo Ciamician”, Alma Mater Studiorum Università di Bologna, via Selmi 2, 40126 Bologna, Italy.

<sup>c</sup>Laboratorio de Estudios Cristalográficos, IACT (CSIC-UGR), Avda Las Palmeras 4, 18100 Armilla, Spain

|                                    |          |
|------------------------------------|----------|
| Figure SI1: Description of the CDS | pag. SI2 |
| Figure SI2: FTIR patterns          | pag. SI3 |
| Figure SI3 XRD patterns            | pag. SI4 |
| Table SI1                          | pag. SI5 |

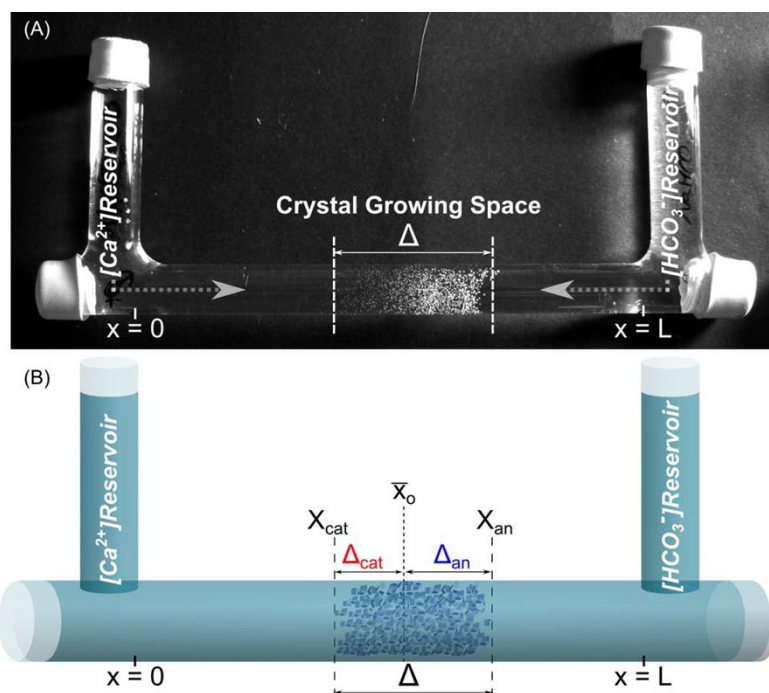

**Figure S11** (A) Camera picture of the U-tube set-up used for  $\text{CaCO}_3$  crystallization experiments in CDS using agarose gels and viscous sols. (B) Schematic illustration of the measured crystallization parameters in the U-tube:  $x_0$ , the starting point of precipitation;  $\Delta$ , the crystal growing space;  $x_{\text{cat}}$  and  $x_{\text{an}}$ , the boundaries of the crystal growing space close to the cationic and anionic reservoir, respectively;  $\Delta_{\text{cat}}$  and  $\Delta_{\text{an}}$ , the crystal growing space from the starting point  $x_0$  to  $x_{\text{cat}}$  and  $x_{\text{an}}$ , respectively.

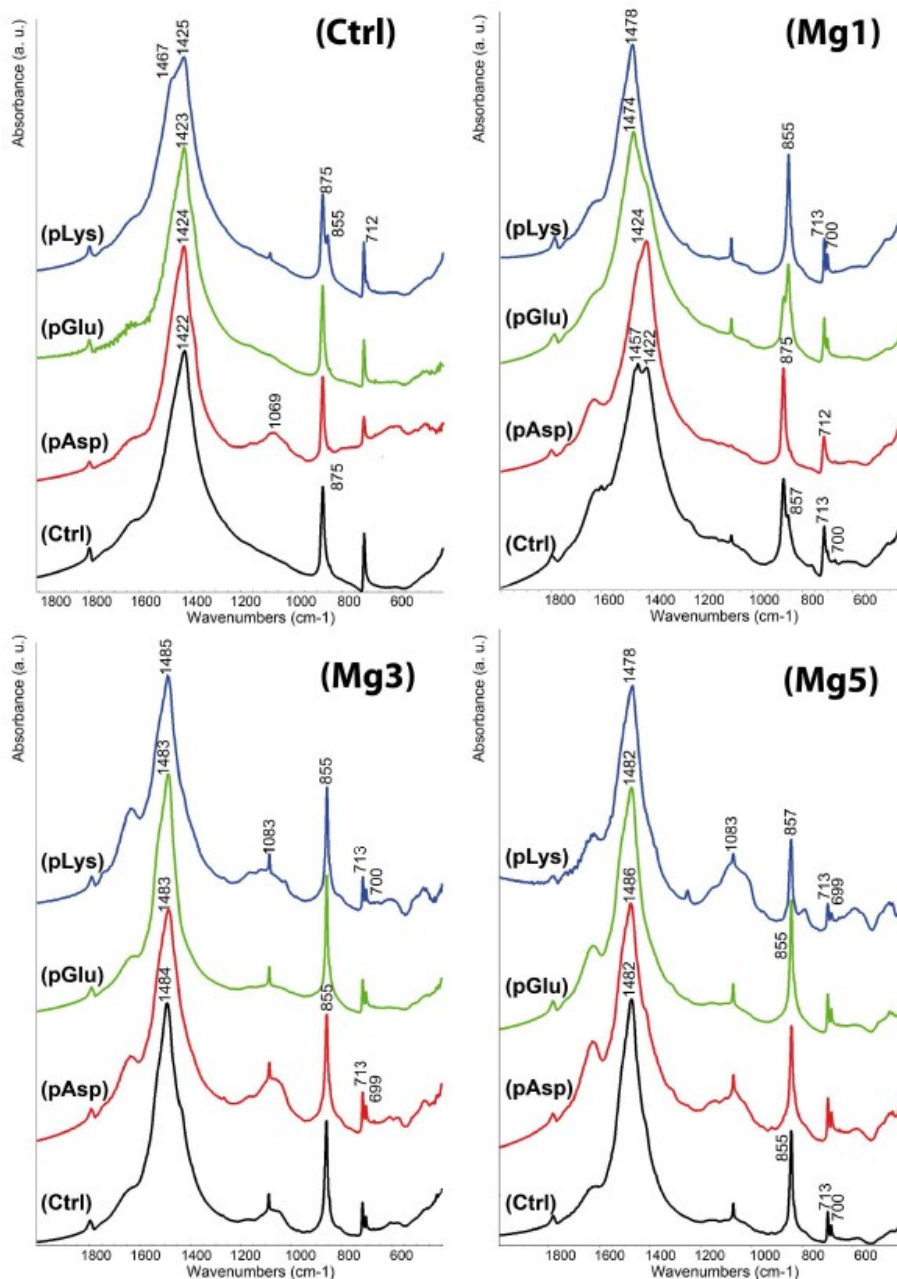

**Figure S12.** FTIR spectra of  $\text{CaCO}_3$  precipitated in agarose viscous sols entrapping pLys (blue), pGlu (green) or pAsp (red), and in additive-free experiments (black). Each set of spectra refers to experiments  $\text{Mg}^{2+}$ -free (left-upper corner) or  $\text{Mg}^{2+}/\text{Ca}^{2+}$  molar ratios equal to 1 (right-upper corner), 3 (left-lower corner) or 5 (right-lower corner). The absorption intensities of the FTIR bands are reported in arbitrary units (a.u.). The salient features of infrared spectra of calcite are 1429, 877 and 713  $\text{cm}^{-1}$ ; and of aragonite, 1477, 1083, 858, 713 and 700  $\text{cm}^{-1}$ . The peaks at 1477 and 1429  $\text{cm}^{-1}$  correspond to the  $\nu_3$  absorption band of carbonate ions; the peaks at 877, 858 correspond to  $\nu_2$  and 713 and 700  $\text{cm}^{-1}$  correspond to  $\nu_4$  absorption bands of carbonate ions.

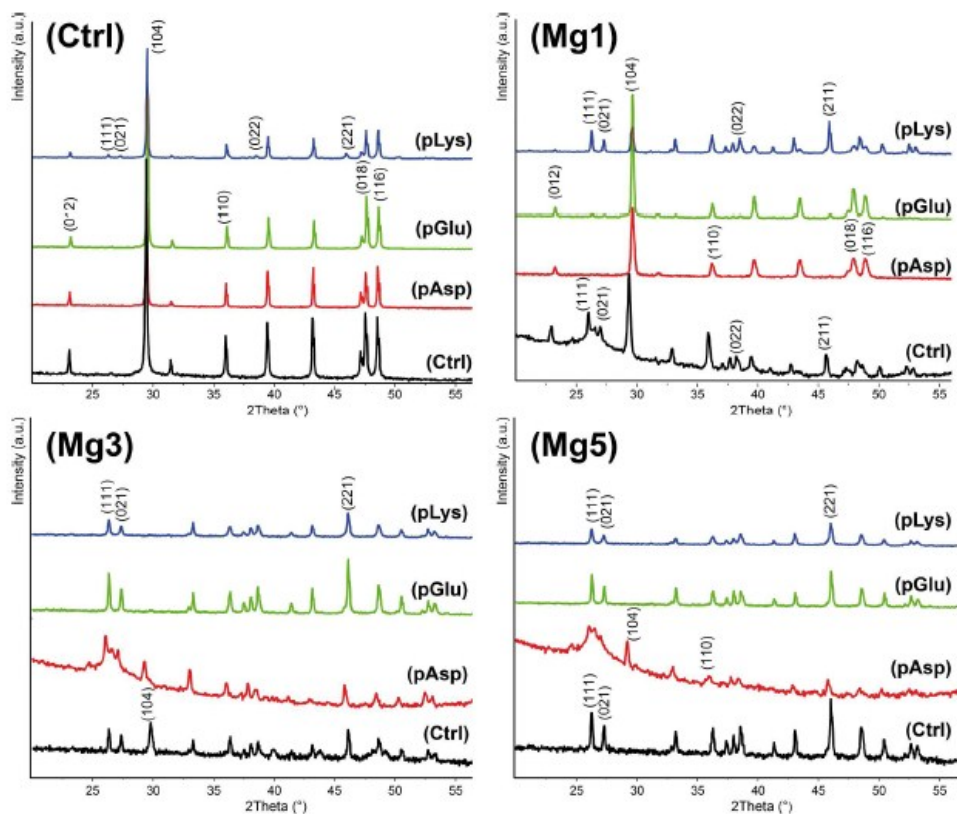

**Figure S13.** X-ray powder diffraction patterns of the  $\text{CaCO}_3$  precipitated in agarose viscous sols entrapping pLys (blue), pGlu (green) or pAsp (red), and in absence of additive (black). Each set of spectra refers to experiments carried out in  $\text{Mg}^{2+}$ -free (left-upper corner) or  $\text{Mg}^{2+}/\text{Ca}^{2+}$  equals to 1 (right-upper corner), 3 (left-lower corner) or 5 (right-lower corner). The main diffraction peaks for calcite, (012), (104), (110), (018) and (116), and aragonite (111), (021), (022) and (221), are indicated according to the reference patterns PDF-calcite 01-083-0587 and PDF-aragonite 01-077-0606. The diffractograms are shifted along the Y-axis that reports intensity in arbitrary units (a.u.).

**Table S11** Crystallization parameters measured in experiments of CaCO<sub>3</sub> precipitation in CDS using charged polypeptides entrapped in an agarose viscous sol and diffusing Mg<sup>2+</sup>. Measured parameters are  $x_o$ ,  $\Delta_{cat}$ ,  $\Delta_{an}$ ,  $t_w$  and  $d_c$ . From up to down the lines correspond to Mg<sup>2+</sup>-free experiments (Mg0) in the cation reservoir and Mg<sup>2+</sup>/Ca<sup>2+</sup> molar ratio equal to 1(Mg1), 3(Mg3) and 5(Mg5), respectively. Each experiment was repeated at least 3 times and in parenthesis is reported the standard deviation.

|            |             | $\Delta_{cat}$ | $x_o$       | $\Delta_{an}$ | $t_w$ | $d_c$          |
|------------|-------------|----------------|-------------|---------------|-------|----------------|
| <b>Mg0</b> | <b>Ref.</b> | 0.10 (0.06)    | 0.66 (0.12) | 0.16 (0.06)   | ~2    | <i>l, m</i>    |
|            | <b>pLys</b> | 0.11 (0.08)    | 0.68 (0.09) | 0.18 (0.06)   | ~4    | <i>l, m, h</i> |
|            | <b>pGlu</b> | 0.06 (0.07)    | 0.66 (0.08) | 0.06 (0.05)   | ~2    | <i>m</i>       |
|            | <b>pAsp</b> | 0.02 (0.01)    | 0.64 (0.02) | 0.03 (0.02)   | ~3    | <i>h</i>       |
| <b>Mg1</b> | <b>Ref.</b> | 0.13 (0.05)    | 0.68 (0.04) | 0.15 (0.04)   | ~4    | <i>l</i>       |
|            | <b>pLys</b> | 0.13 (0.07)    | 0.68 (0.12) | 0.15 (0.05)   | ~3    | <i>l, h, m</i> |
|            | <b>pGlu</b> | 0.07 (0.02)    | 0.65 (0.04) | 0.11 (0.05)   | ~4    | <i>m</i>       |
|            | <b>pAsp</b> | 0.04 (0.02)    | 0.76 (0.02) | 0.04 (0.03)   | ~4    | <i>h</i>       |
| <b>Mg3</b> | <b>Ref.</b> | 0.19 (0.02)    | 0.60 (0.04) | 0.12 (0.02)   | 2-3   | <i>l</i>       |
|            | <b>pLys</b> | 0.16 (0.07)    | 0.68 (0.10) | 0.14 (0.09)   | ~5    | <i>l</i>       |
|            | <b>pGlu</b> | 0.09 (0.01)    | 0.74 (0.04) | 0.09 (0.07)   | ~3    | <i>m</i>       |
|            | <b>pAsp</b> | 0.04 (0.08)    | 0.74 (0.08) | 0.02 (0.09)   | ~6    | <i>m</i>       |
| <b>Mg5</b> | <b>Ref.</b> | 0.16 (0.05)    | 0.42 (0.07) | 0.12 (0.05)   | ~3    | <i>l</i>       |
|            | <b>pLys</b> | 0.14 (0.04)    | 0.70 (0.04) | 0.11 (0.03)   | ~5    | <i>l</i>       |
|            | <b>pGlu</b> | 0.08 (0.04)    | 0.66 (0.03) | 0.06 (0.05)   | 2-3   | <i>l, m</i>    |
|            | <b>pAsp</b> | 0.06 (0.14)    | 0.73 (0.14) | 0.018         | ~8    | <i>l</i>       |

The density of crystallization is indicated as low (l), medium (m) and high (h).
